# Supplementary material for: Impacts of urban land-surface forcing on ozone air quality in the Seoul metropolitan area
Source: Copernicus journal article supplement (doi:10.5194/acp-13-2177-2013), 2013-02-25
Supplement: Supplementary file 1 [file acp-13-2177-2013-supplement.pdf]

Table S1. The CMAQ default concentration profiles for the relevant species at the four boundaries. The levels of the 1<sup>st</sup>, 8<sup>th</sup>, and 15<sup>th</sup> layers correspond to ~17, ~580, and ~1500 m, respectively. The concentration unit is ppb. The description of the lumped VOC groups can be found in Carter (2000).

|                 | West boundary         |                       |                        | North boundary        |                       |                        | East boundary         |                       |                        | South boundary        |                       |                        |
|-----------------|-----------------------|-----------------------|------------------------|-----------------------|-----------------------|------------------------|-----------------------|-----------------------|------------------------|-----------------------|-----------------------|------------------------|
|                 | 1 <sup>st</sup> layer | 8 <sup>th</sup> layer | 15 <sup>th</sup> layer | 1 <sup>st</sup> layer | 8 <sup>th</sup> layer | 15 <sup>th</sup> layer | 1 <sup>st</sup> layer | 8 <sup>th</sup> layer | 15 <sup>th</sup> layer | 1 <sup>st</sup> layer | 8 <sup>th</sup> layer | 15 <sup>th</sup> layer |
| O <sub>3</sub>  | 3.5×10 <sup>1</sup>   | 4.1×10 <sup>1</sup>   | 4.6×10 <sup>1</sup>    | 3.5×10 <sup>1</sup>   | 3.6×10 <sup>1</sup>   | 4.3×10 <sup>1</sup>    | 3.0×10 <sup>1</sup>   | 3.6×10 <sup>1</sup>   | 4.3×10 <sup>1</sup>    | 3.0×10 <sup>1</sup>   | 3.6×10 <sup>1</sup>   | 4.3×10 <sup>1</sup>    |
| NO              | 8.3×10 <sup>-2</sup>  | 8.3×10 <sup>-2</sup>  | 7.1×10 <sup>-2</sup>   | 8.3×10 <sup>-2</sup>  | 7.1×10 <sup>-2</sup>  | 3.0×10 <sup>-2</sup>   | 0                     | 0                     | 0                      | 1.0×10 <sup>-2</sup>  | 7.1×10 <sup>-3</sup>  | 0                      |
| NO <sub>2</sub> | 1.7×10 <sup>-1</sup>  | 1.7×10 <sup>-1</sup>  | 1.4×10 <sup>-1</sup>   | 1.7×10 <sup>-1</sup>  | 1.4×10 <sup>-1</sup>  | 6.0×10 <sup>-2</sup>   | 1.0×10 <sup>-2</sup>  | 7.1×10 <sup>-3</sup>  | 0                      | 1.0×10 <sup>-2</sup>  | 7.1×10 <sup>-3</sup>  | 0                      |
| PAN             | 1.5×10 <sup>-1</sup>  | 1.5×10 <sup>-1</sup>  | 1.3×10 <sup>-1</sup>   | 1.0×10 <sup>-1</sup>  | 8.6×10 <sup>-2</sup>  | 5.0×10 <sup>-2</sup>   | 1.5×10 <sup>-2</sup>  | 1.5×10 <sup>-2</sup>  | 1.5×10 <sup>-2</sup>   | 1.5×10 <sup>-2</sup>  | 1.5×10 <sup>-2</sup>  | 1.5×10 <sup>-2</sup>   |
| HCHO            | 4.0×10 <sup>-1</sup>  | 4.0×10 <sup>-1</sup>  | 4.0×10 <sup>-1</sup>   | 2.5×10 <sup>-1</sup>  | 2.5×10 <sup>-1</sup>  | 2.4×10 <sup>-1</sup>   | 2.5×10 <sup>-1</sup>  | 2.5×10 <sup>-1</sup>  | 2.4×10 <sup>-1</sup>   | 2.5×10 <sup>-1</sup>  | 2.5×10 <sup>-1</sup>  | 2.4×10 <sup>-1</sup>   |
| ALK1            | 1.0×10 <sup>-1</sup>  | 1.0×10 <sup>-1</sup>  | 9.3×10 <sup>-2</sup>   | 1.0×10 <sup>-1</sup>  | 9.4×10 <sup>-2</sup>  | 6.6×10 <sup>-2</sup>   | 1.0×10 <sup>-1</sup>  | 1.0×10 <sup>-1</sup>  | 9.1×10 <sup>-2</sup>   | 1.0×10 <sup>-1</sup>  | 1.0×10 <sup>-1</sup>  | 9.1×10 <sup>-2</sup>   |
| ALK2            | 4.0×10 <sup>-2</sup>  | 4.0×10 <sup>-2</sup>  | 3.7×10 <sup>-2</sup>   | 2.0×10 <sup>-2</sup>  | 1.9×10 <sup>-2</sup>  | 1.3×10 <sup>-2</sup>   | 6.0×10 <sup>-3</sup>  | 6.0×10 <sup>-3</sup>  | 5.4×10 <sup>-3</sup>   | 6.0×10 <sup>-3</sup>  | 6.0×10 <sup>-3</sup>  | 4.8×10 <sup>-3</sup>   |
| ARO1            | 1.0×10 <sup>-2</sup>  | 5.0×10 <sup>-3</sup>  | 4.4×10 <sup>-3</sup>   | 1.0×10 <sup>-3</sup>  | 1.0×10 <sup>-3</sup>  | 1.0×10 <sup>-3</sup>   | 0                     | 0                     | 0                      | 0                     | 0                     | 0                      |
| ARO2            | 3.0×10 <sup>-3</sup>  | 1.5×10 <sup>-3</sup>  | 4.0×10 <sup>-4</sup>   | 2.0×10 <sup>-4</sup>  | 1.7×10 <sup>-4</sup>  | 7.1×10 <sup>-5</sup>   | 0                     | 0                     | 0                      | 0                     | 0                     | 0                      |
| CO              | 8.0×10 <sup>1</sup>   | 8.0×10 <sup>1</sup>   | 8.0×10 <sup>1</sup>    | 8.0×10 <sup>1</sup>   | 8.0×10 <sup>1</sup>   | 7.7×10 <sup>1</sup>    | 8.0×10 <sup>1</sup>   | 8.0×10 <sup>1</sup>   | 7.9×10 <sup>1</sup>    | 7.0×10 <sup>1</sup>   | 7.0×10 <sup>1</sup>   | 7.0×10 <sup>1</sup>    |

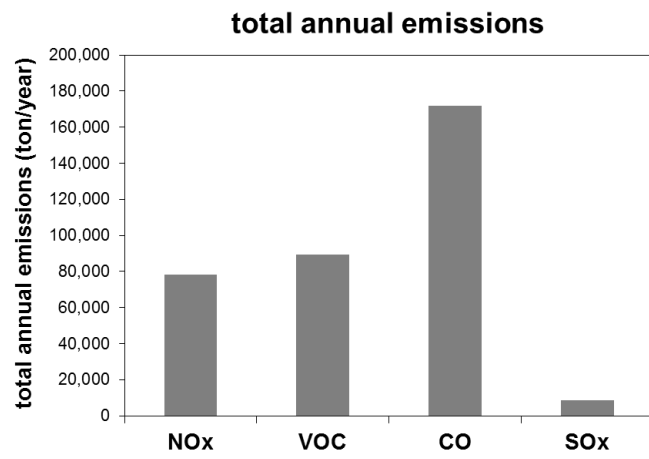

Figure S1. Total annual emissions of NO<sub>x</sub>, VOC, CO, and SO<sub>x</sub> (= SO<sub>2</sub> + SO<sub>3</sub>) in Seoul.
